# Supplementary material for: Crystallization design of MnO2via acid towards better oxygen reduction activity
Source: Royal Society of Chemistry journal article supplement (doi:10.1039/c6ce01131d), 2016-01-01
Supplement: c6ce01131d1.pdf [file c6ce01131d1.pdf]

### Supplementary information

**Table S1** Surface Areas, Pore Sizes, and Pore Volumes of the MnO<sub>2</sub> samples

| Samples            | Surface area <sup>*</sup> (m <sup>2</sup> g <sup>-1</sup> ) | Average pore diameter(nm) | Pore volume(cm <sup>3</sup> g <sup>-1</sup> ) |
|--------------------|-------------------------------------------------------------|---------------------------|-----------------------------------------------|
|                    | 1)                                                          | **                        | ***                                           |
| α-MnO <sub>2</sub> | 78.3                                                        | 7.11                      | 0.122                                         |
| γ-MnO <sub>2</sub> | 70.7                                                        | 6.75                      | 0.104                                         |

Noted: \* the surface area is based on the BET method.

\*\* the pore diameter is based on the BJH desorption average pore diameter

\*\*\* the pore volume is based on the BJH desorption cumulative volume of pores

**Table S2** Some recently reported MnO<sub>2</sub> catalysts for ORR

| Samples                                              | $E_{\text{onset}}$ (V) | $E_{\text{half}}$ (V) | Ref       |
|------------------------------------------------------|------------------------|-----------------------|-----------|
| $\alpha$ -MnO <sub>2</sub> 3D<br>microscopic spheres | 0.85                   | 0.72                  | This work |
| $\alpha$ -MnO <sub>2</sub> nanorods                  | 0.89                   | 0.71                  | [1]       |
| Cu- $\alpha$ -MnO <sub>2</sub> NWs                   | 0.85                   | 0.71                  | [2]       |
| $\beta$ -MnO <sub>2</sub> nanorods<br>with vacancies | 0.86                   | 0.72                  | [3]       |
| $\alpha$ -MnO <sub>2</sub><br>nanoparticles          | 0.71                   | 0.57                  | [4]       |
| $\alpha$ -MnO <sub>2</sub> NWs                       | 0.89                   | 0.64                  | [5]       |
| MnO <sub>2</sub> nanoflakes                          | 0.82                   | 0.67                  | [6]       |

Reference:

- 1) W. Xiao, D. Wang and X. W. Lou, *J. Phys. Chem. C*, 2010, **114**, 1694.
- 2) D. J. Davis, T. N. Lambert, J. A. Vigil, M. A. Rodriguez, M. T. Brumbach, E. N. Coker and S. J. Limmer, *J. Phys. Chem. C*, 2014, **118**, 17342.
- 3) F. Cheng, T. Zhang, Y. Zhang, J. Du, X. Han and J. Chen, *Angew. Chem., Int. Ed.*, 2013, **52**, 2474.
- 4) C. Shi, G.-L. Zang, Z. Zhang, G.-P. Sheng, Y.-X. Huang, G.-X. Zhao, X.-K. Wang and H.-Q. Yu, *Electrochim. Acta*, 2014, **132**, 239.
- 5) K. Selvakumar, S. M. Senthil Kumar, R. Thangamuthu, K. Ganesan, P. Murugan, P. Rajput, S. N. Jha and D. Bhattacharyya, *J. Phys. Chem. C*, 2015, **119**, 6604.
- 6) C. Wei, L. Yu, C. Cui, J. Lin, C. Wei, N. Mathews, F. Huo, T. Sritharan and Z. Xu, *Chem. Commun.*, 2014, **50**, 7885.

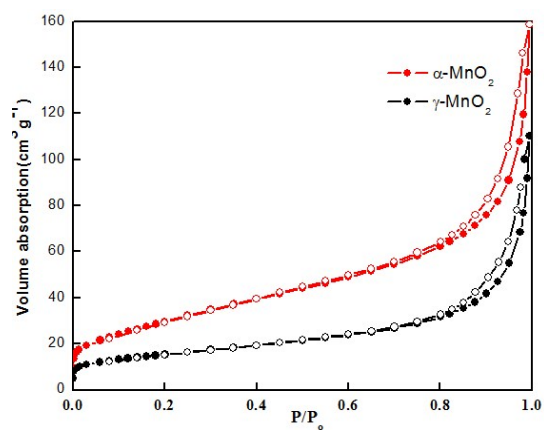

Fig. S1 Nitrogen adsorption-desorption isotherms of MnO<sub>2</sub> samples

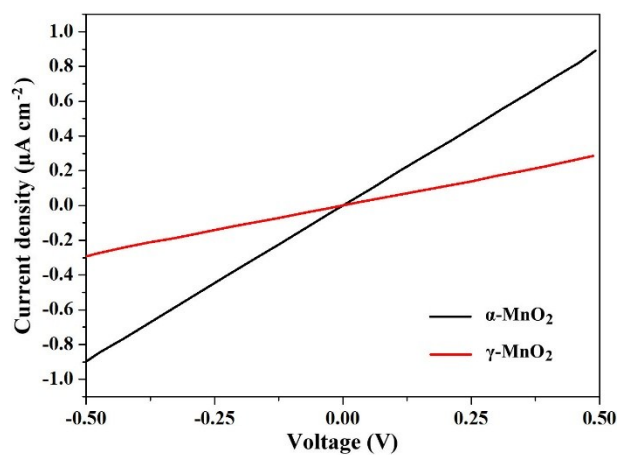

Fig. S2 Comparison of the I-V curves of the two MnO<sub>2</sub> samples.

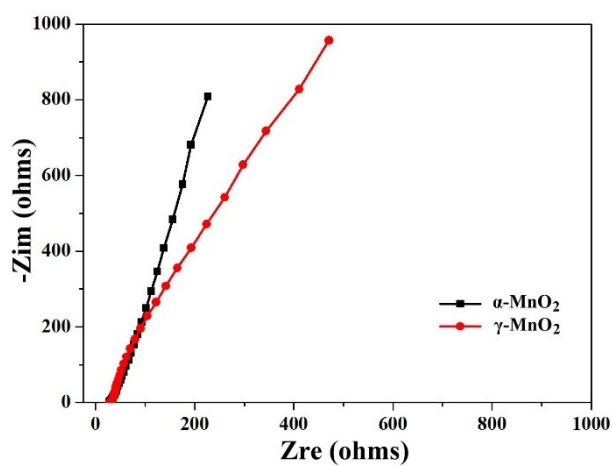

Fig. S3 Nyquist plots of EIS for the ORR at 0.7 V in O<sub>2</sub> saturated 0.1 M KOH.
